# Supplementary material for: Functional evolution of critically ill patients undergoing an early rehabilitation protocol
Source: PubMed Central journal article supplement — Rev Bras Ter Intensiva. 2015 Apr-Jun;27(2):161–9. doi: 10.5935/0103-507X.20150028 (PMC4489785; doi:10.5935/0103-507x.20150028), 2015
Supplement: rbti-27-02-0161-suppl01.pdf [file rbti-27-02-0161-suppl01.pdf]

# Functional evolution of critically ill patients undergoing an early rehabilitation protocol

## *Evolução funcional de pacientes graves submetidos a um protocolo de reabilitação precoce*

Fernanda Murata Murakami<sup>1</sup>, Wellington Pereira Yamaguti<sup>1</sup>, Mirian Akemi Onoue<sup>1</sup>, Juliana Mesti Mendes<sup>1</sup>, Renata Santos Pedrosa<sup>1</sup>, Ana Lúgia Vasconcellos Maida<sup>1</sup>, Cláudia Seiko Kondo<sup>1</sup>, Isabel Chateaubriand Diniz de Salles<sup>1</sup>, Christina May Moran de Brito<sup>1</sup>, Miguel Koite Rodrigues<sup>1</sup>

**Table S1** - Description of therapeutic strategies for each Intervention Plan (functional and peripheral muscle training)

| Intervention plan                | I                                                                                                                                                                                                                                                   | II                                                                                                                                                                                                                                                              | III                                                                                                                                                                                                                                                                                                                   | IV                                                                                                                                                                                                                                                      |
|----------------------------------|-----------------------------------------------------------------------------------------------------------------------------------------------------------------------------------------------------------------------------------------------------|-----------------------------------------------------------------------------------------------------------------------------------------------------------------------------------------------------------------------------------------------------------------|-----------------------------------------------------------------------------------------------------------------------------------------------------------------------------------------------------------------------------------------------------------------------------------------------------------------------|---------------------------------------------------------------------------------------------------------------------------------------------------------------------------------------------------------------------------------------------------------|
| Prior functional activity        | Bedridden patient                                                                                                                                                                                                                                   | Tolerates assisted bedside sedestation                                                                                                                                                                                                                          | Tolerates orthostatism and exchange of steps                                                                                                                                                                                                                                                                          | Tolerates ambulation with distance progression                                                                                                                                                                                                          |
| In-bed mobilization training     | Perform lateral decubitus movement                                                                                                                                                                                                                  | Move from supine to sitting at the bedside (trunk control training and assisted sedestation)                                                                                                                                                                    | Maintain Plan II + motion from supine to sitting at the bedside (trunk control training without assistance)                                                                                                                                                                                                           | Train functional independence + train relatives regarding the need for orthoses and walking aids                                                                                                                                                        |
| Transfer training                | Perform transfer to the armchair with full assistance (gradually increase time) or remain sitting in bed-chair                                                                                                                                      | Perform transfer to the armchair with assistance from the team (gradually increase time) or remain sitting in bed-chair                                                                                                                                         | Perform transfer from the bed to the armchair with assistance from the multidisciplinary team and train active orthostatism                                                                                                                                                                                           | Perform transfers with minimal assistance                                                                                                                                                                                                               |
| Orthostatism/ambulation training | Consider assisted orthostatism with orthostatic board                                                                                                                                                                                               | Consider assisted orthostatism with orthostatic board                                                                                                                                                                                                           | Perform ambulation training assisted by the physical therapist for limited distances and focused on a gradual distance increase                                                                                                                                                                                       | Perform ambulation with minimum assistance + training involving descending and ascending flights of stairs according to patient tolerance                                                                                                               |
| Peripheral muscle training       | Passive joint mobilization (10 repetitions of joint mobilization of the shoulder girdle, pelvis and extremities with flexion, extension, adduction and abduction) + stretching + perform NMEE in cases with time > 3 days in the same training plan | Assisted and/or free, active exercises (10 repetitions of joint mobilization of the shoulder girdle, pelvis and extremities with flexion, extension, adduction and abduction) + stretching + perform NMEE in cases with time > 3 days in the same training plan | Resistance exercises with dumbbells and ankle weights (shoulder abduction, elbow flexion-extension, wrist extension, hip flexion, knee extension and ankle dorsiflexion - 10 repetitions for each joint) + stretching + perform stationary bicycle training in cases with prolonged hospitalization forecast > 7 days | Resistance exercises with load progression (load increase should be performed according to the tolerance of the patient and evaluated each session) + perform stationary bicycle leg training in cases with prolonged hospitalization forecast > 7 days |
| Length                           | 30 - 60 minutes                                                                                                                                                                                                                                     | 30 - 60 minutes                                                                                                                                                                                                                                                 | 30 - 60 minutes                                                                                                                                                                                                                                                                                                       | 30 - 60 minutes                                                                                                                                                                                                                                         |
| Frequency                        | Once daily                                                                                                                                                                                                                                          | Once daily                                                                                                                                                                                                                                                      | Once daily                                                                                                                                                                                                                                                                                                            | Once daily                                                                                                                                                                                                                                              |

NMEE - neuromuscular electrical stimulation.

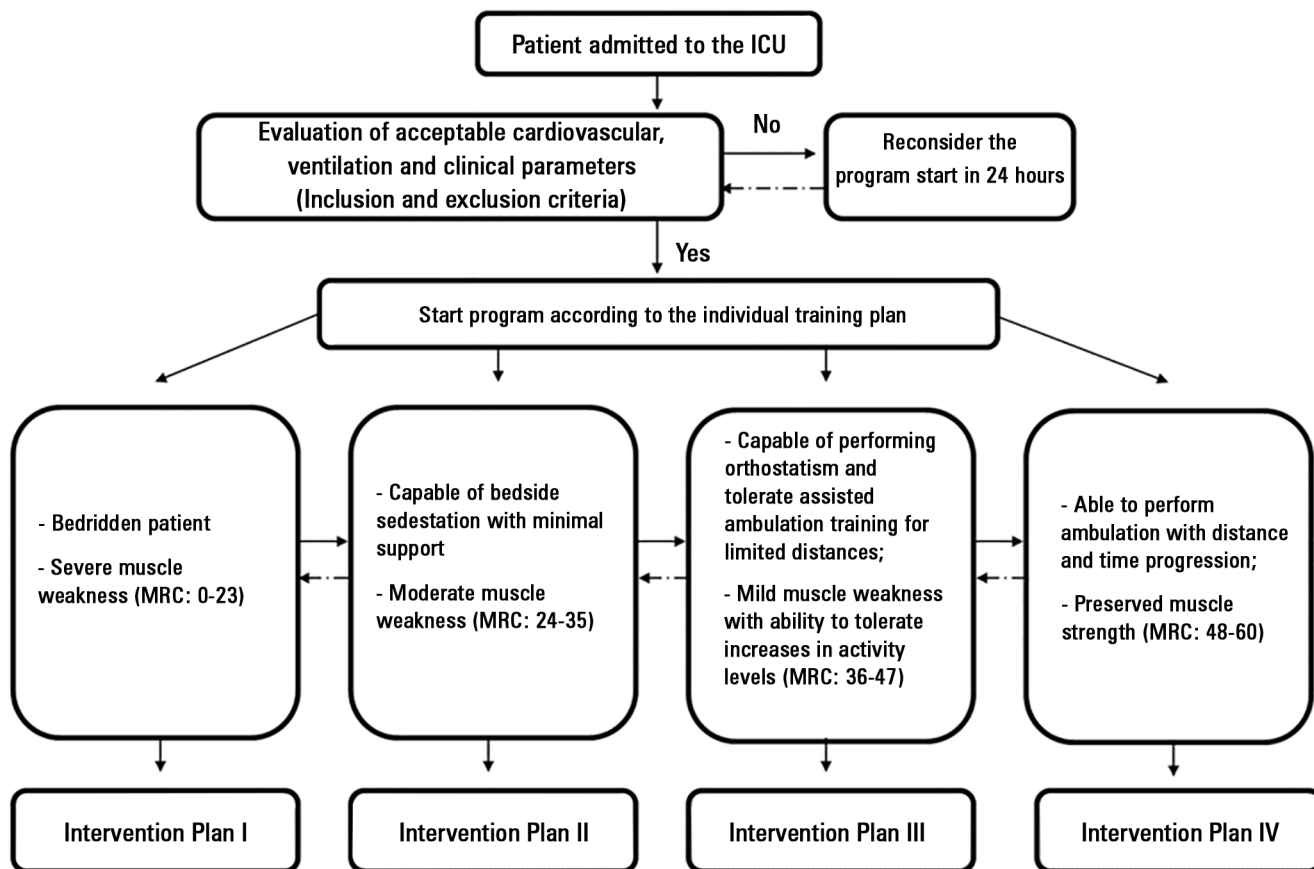

**Figure S1** - Flow chart defining the Intervention Plan according to the functional limitations of the patient. ICU - intensive care unit; MRC - Medical Research Council.
